# Supplementary material for: Construction of GSH-triggered cationic fluoropolymers as two-in-one nanoplatforms for combined chemo-gene therapy
Source: Royal Society of Chemistry journal article supplement (doi:10.1039/d1tb02602j), 2022-01-01
Supplement: d1tb02602j1.pdf [file d1tb02602j1.pdf]

## Supplementary Information

### **Construction of GSH-triggered cationic fluoropolymer as two-in-one nanoplatform for combined chemo/gene therapy**

Yu-Rong Zhan,<sup>a</sup> Juan Tan,<sup>b</sup> Meng-Wei Hei,<sup>a</sup> Shi-Yong Zhang,<sup>b</sup> Ji Zhang,<sup>\*,a</sup> and Xiao-Qi Yu<sup>\*,a,c</sup>

<sup>a</sup>*Key Laboratory of Green Chemistry and Technology (Ministry of Education), College of Chemistry, Sichuan University, Chengdu 610064, P. R. China*

<sup>b</sup>*College of Chemistry and National Engineering Research Center for Biomaterials, Sichuan University, Chengdu, 610064, China*

<sup>c</sup>*Department of Chemistry, Xihua University, Chengdu 610039, P. R. China*

\*Corresponding authors: jzhang@scu.edu.cn, +86-28-85412627 (J. Zhang); xqyu@scu.edu.cn, +86-28-85415886 (X.-Q. Yu).

**Table S1.** Relative transfection efficiency of PSSF (according to PEI 25k) at various mass ratios (with reference to Figure 4C).

|             | w/w=10 | w/w=15 | w/w=20 | w/w=25 |
|-------------|--------|--------|--------|--------|
| <b>HeLa</b> | 1.58   | 5.35   | 9.93   | 14.11  |
| <b>U2OS</b> | 5.51   | 3.91   | 3.32   | 2.67   |

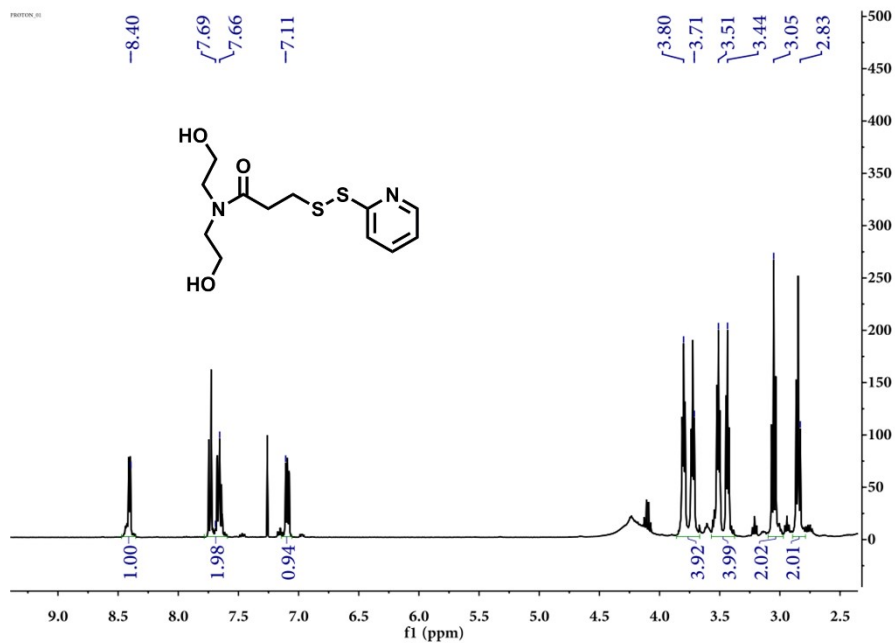

**Figure S1.** <sup>1</sup>H NMR spectrum of compound 2 in CDCl<sub>3</sub>.

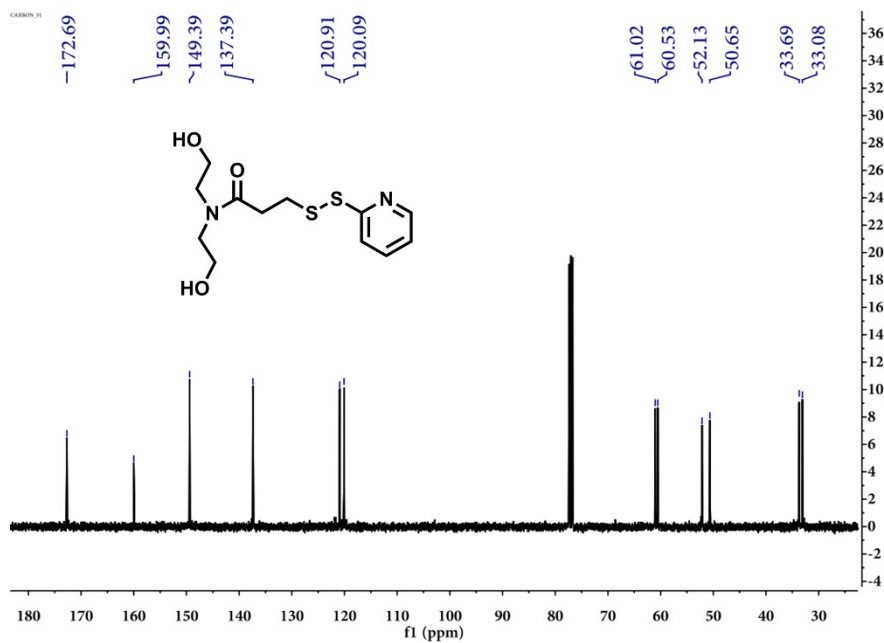

**Figure S2.**  $^{13}\text{C}$  NMR spectrum of compound **2** in  $\text{CDCl}_3$ .

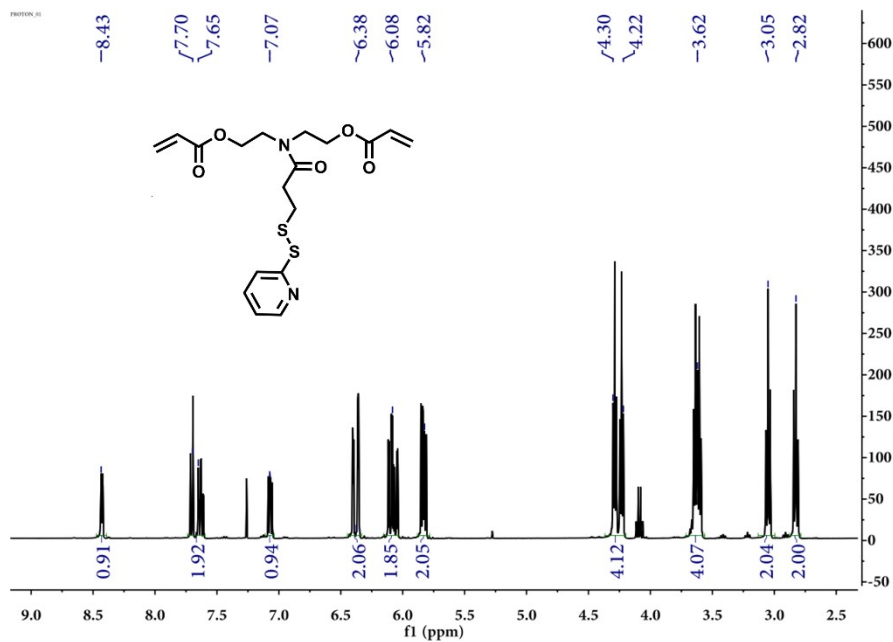

**Figure S3.**  $^1\text{H}$  NMR spectrum of compound **SS** in  $\text{CDCl}_3$ .

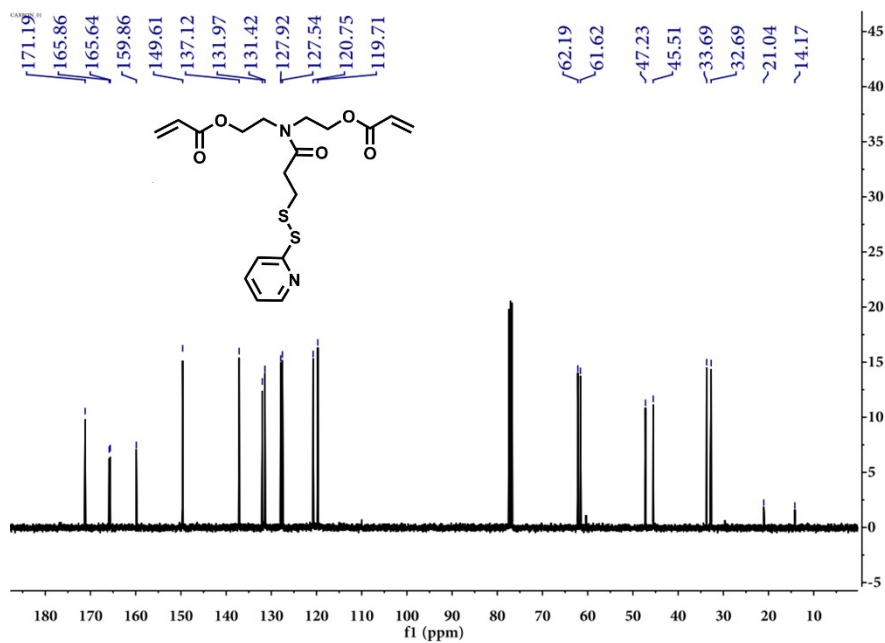

Figure S4. <sup>13</sup>C NMR spectrum of compound SS in CDCl<sub>3</sub>.

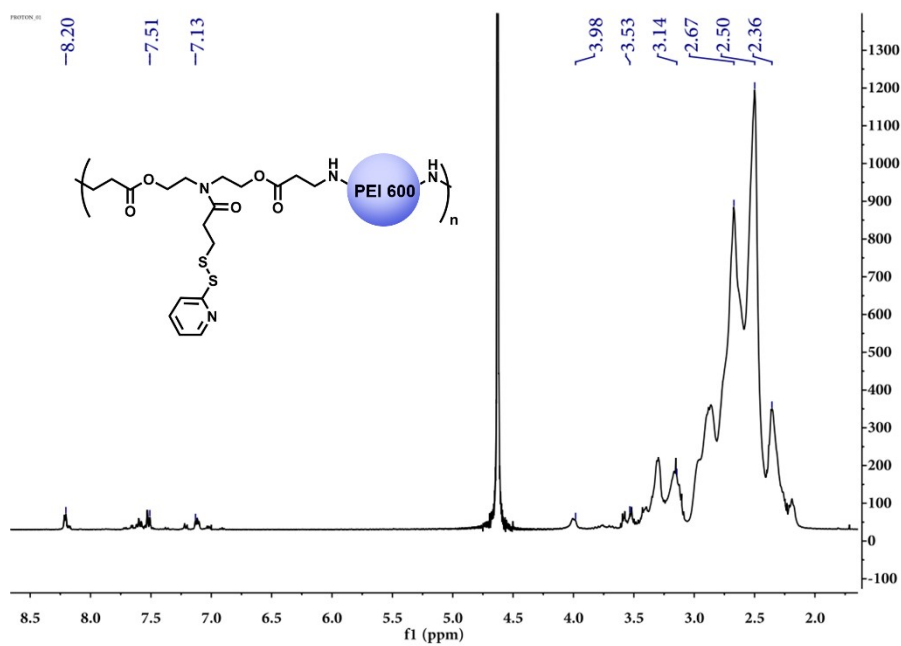

Figure S5. <sup>1</sup>H NMR spectrum of PSS in D<sub>2</sub>O.

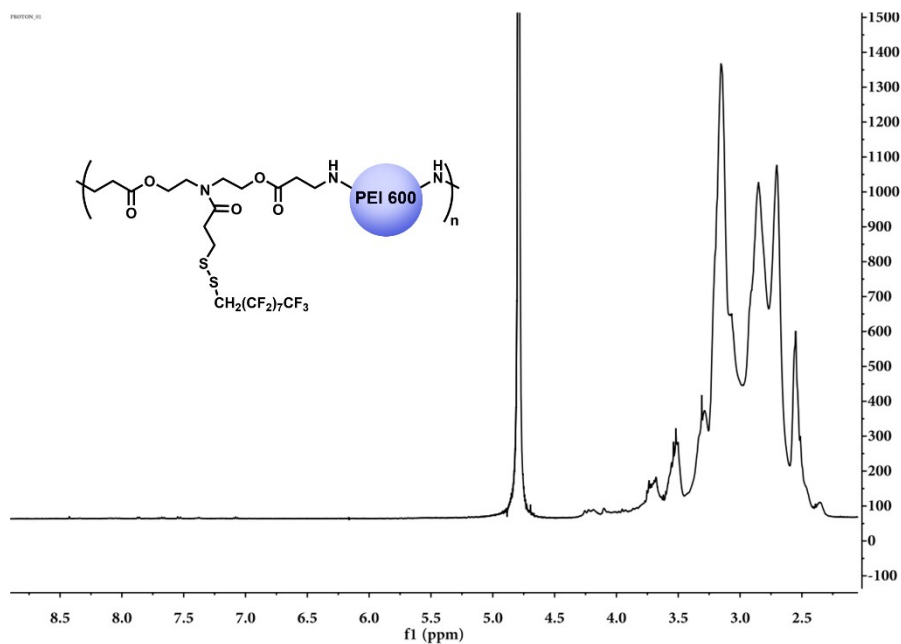

**Figure S6.** <sup>1</sup>H NMR spectrum of PSSF in D<sub>2</sub>O.

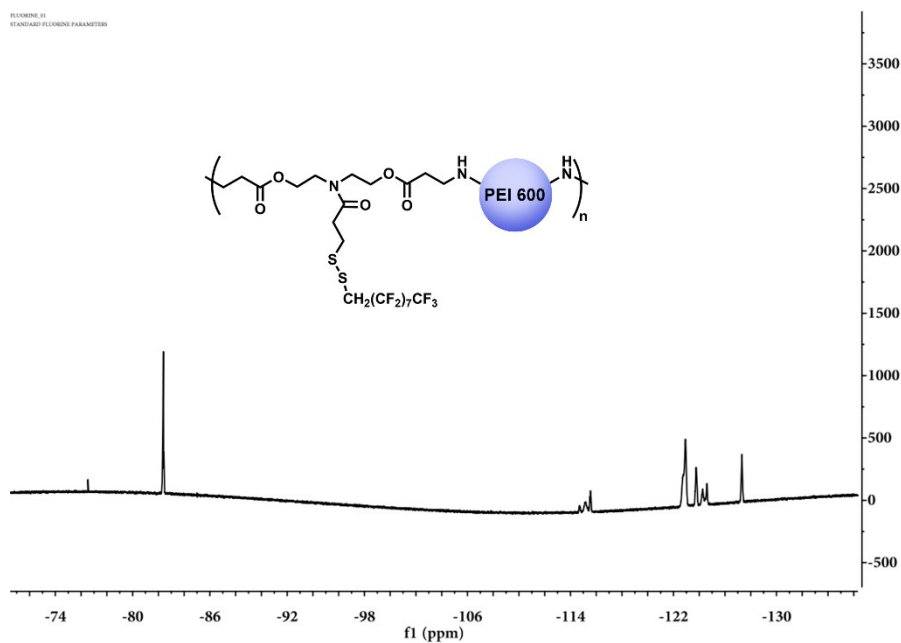

**Figure S7.** <sup>19</sup>F NMR spectrum of PSSF in MeOD.

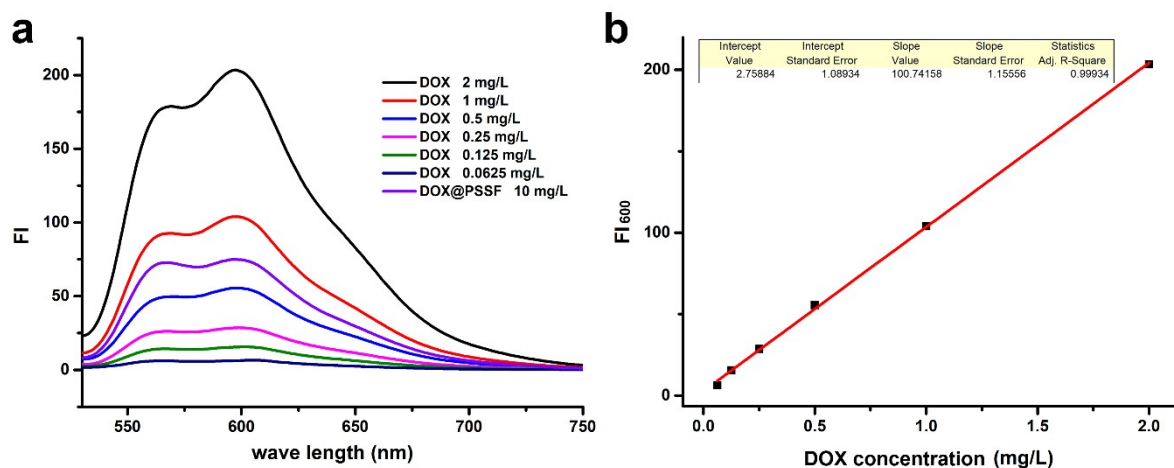

**Figure S8.** (a) The fluorescence spectrum of DOX and DOX@PSSF at different concentrations. (b) Standard curve of FI<sub>600</sub>-DOX concentration.

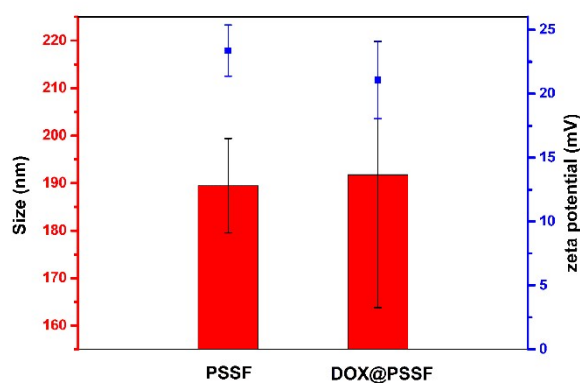

**Figure S9.** Particle size (columns) and zeta potential (dots) of PSSF and DOX@PSSF.

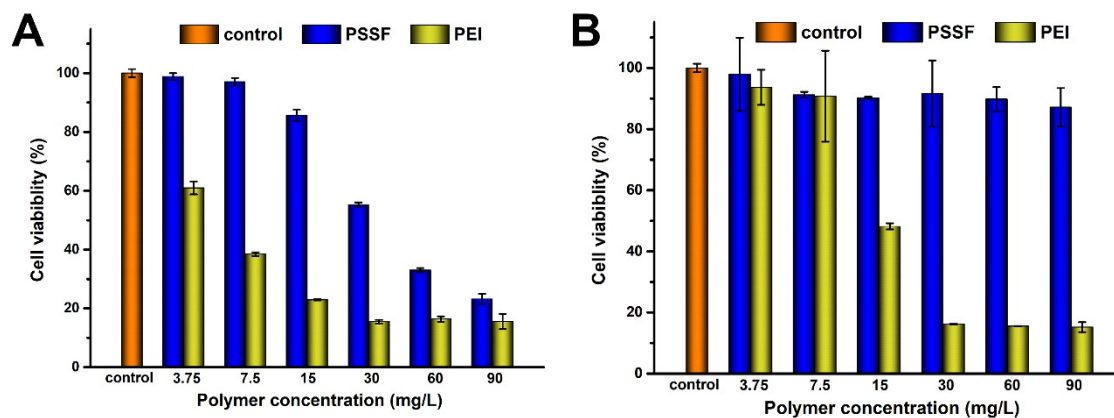

**Figure S10.** Cell viability after treatment with different PSSF concentrations for 48 h in 7702(A) and DC(B) cells

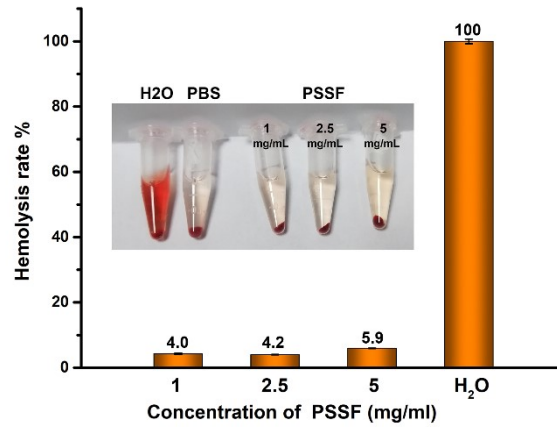

**Figure S11.** Hemolysis rate of **PSSF** at different concentrations after incubation with red blood for 2 h. Data represent mean  $\pm$  SD (n=3).

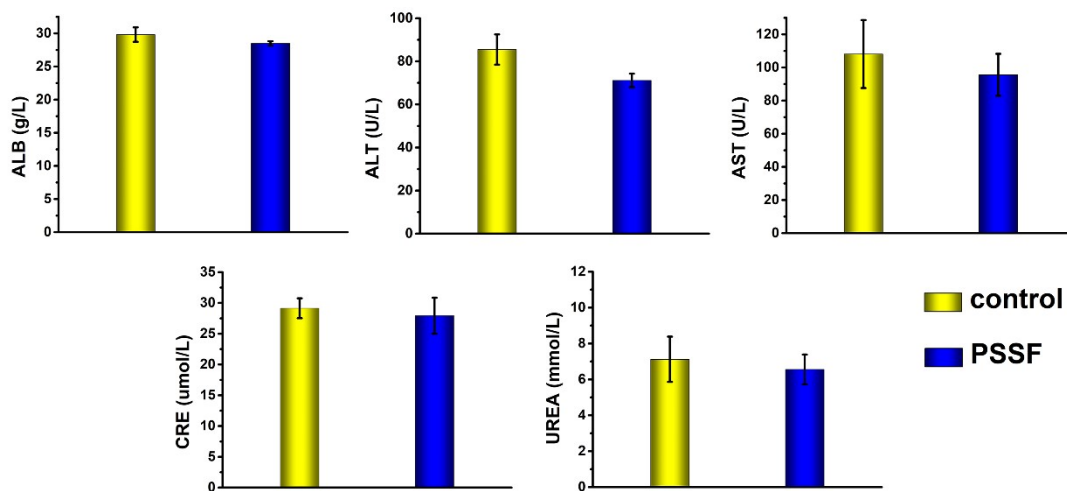

**Figure S12.** The blood biochemical indexes (ALB, ALT, AST, CRE, UREA) of mice injected with **PSSF** (50 mg/kg, once every other day, 3 times in total).

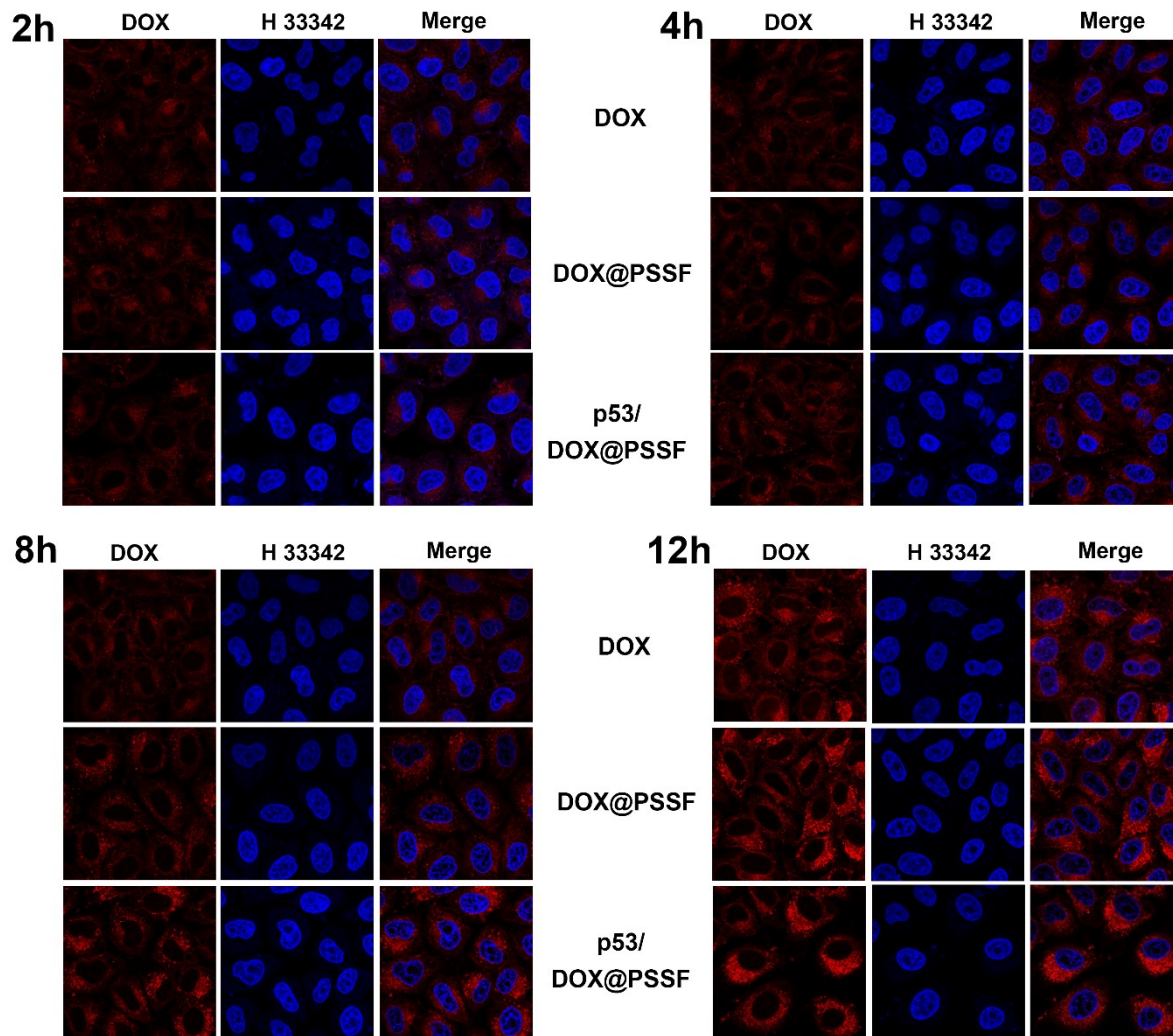

**Figure S13.** Cellular uptake of DOX at 2, 4, 8 and 12 h under different treatments (DOX: 2  $\mu\text{g/mL}$ , p53: 1.85  $\mu\text{g/mL}$ ).

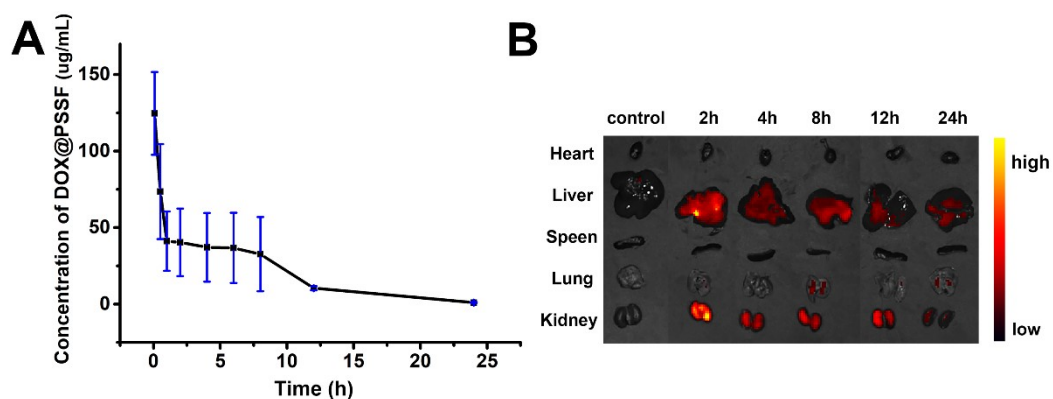

**Figure S14.** After mice tail vein injection, the blood retention (A) and bio-distribution of DOX@PSSF in major organs (B) at various time points.
